# Supplementary material for: Therapeutic Approach of Chronic Pseudomonas Infection in Cystic Fibrosis—A Network Meta-Analysis
Source: MDPI journal article supplement (doi:10.3390/antibiotics10080936), 2021-08-03
Supplement: s1 [file s1]

# Therapeutic Approach of Chronic *Pseudomonas* Infection in Cystic Fibrosis—A Network Meta-Analysis

Orsolya Varannai <sup>1,2,3</sup>, Noémi Gede <sup>2</sup>, Márk Félix Juhász <sup>2</sup>, Zsolt Szakács <sup>2</sup>, Fanni Dembrovszky <sup>2</sup>, Dávid Németh <sup>2</sup>, Péter Hegyi <sup>2,4,5</sup> and Andrea Párnitzky <sup>1,2,4,\*</sup>

<sup>1</sup> Heim Pál National Pediatric Institute, 1089 Budapest, Hungary; varannaiorsolya@gmail.com

<sup>2</sup> Institute for Translational Medicine, Medical School, University of Pécs, 7624 Pécs, Hungary; gede.no-emi@gmail.com (N.G.); flxjuhsz@gmail.com (M.F.J.); szaki92@gmail.com (Z.S.); dembrovszky.f@gmail.com (F.D.); davidsum96@gmail.com (D.N.); hegyi2009@gmail.com (P.H.)

<sup>3</sup> Doctoral School of Clinical Medicine, University of Szeged, 6720 Szeged, Hungary

<sup>4</sup> Centre for Translational Medicine, Semmelweis University, 1085 Budapest, Hungary

<sup>5</sup> Division of Pancreatic Diseases, Heart and Vascular Center, Semmelweis University, 1085 Budapest, Hungary

\* Correspondence: andrea.parnitzky@gmail.com

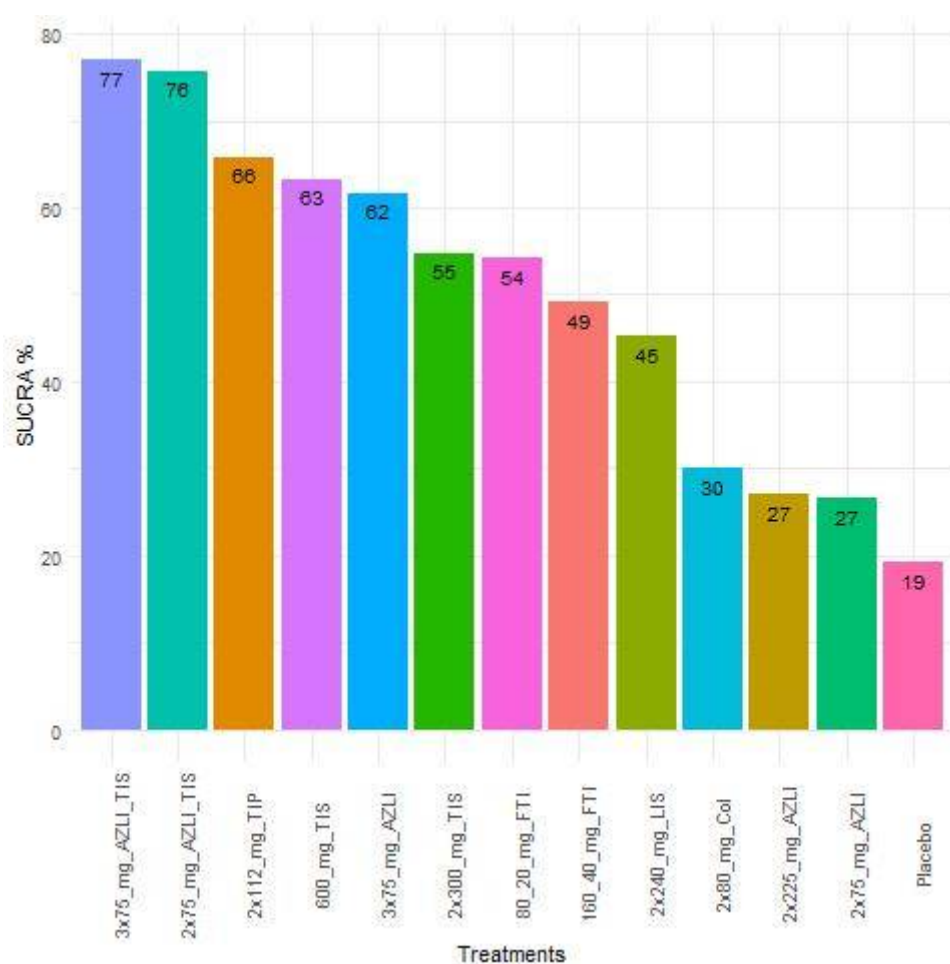

**Figure S1.** Surface under the cumulative ranking curves (SUCRA%) values of change in FEV1%; AZLI= Aztreonam lysine, TIS=Tobramycin inhalation solution, TIP=Tobramycin inhalation powder, LIS=Levofloxacin inhalation solution, FTI=Fosfomycin/Tobramycin.

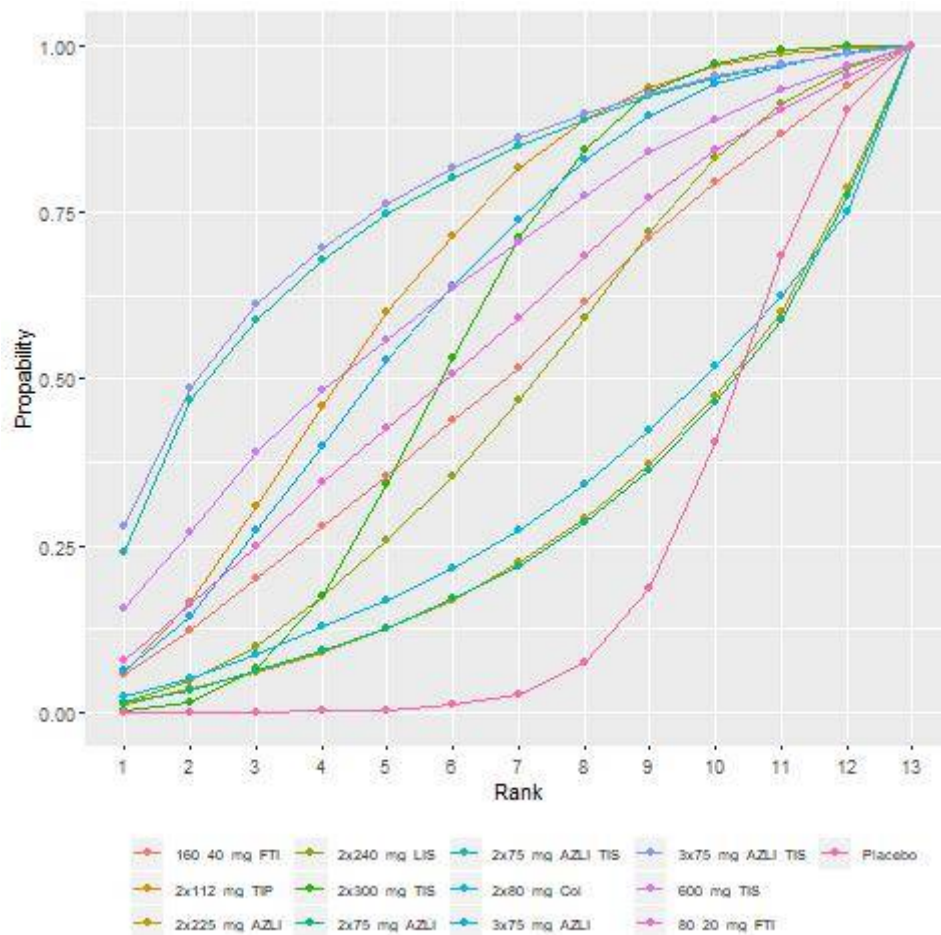

Figure S2. Cumulative ranking curves of change in FEV1%.

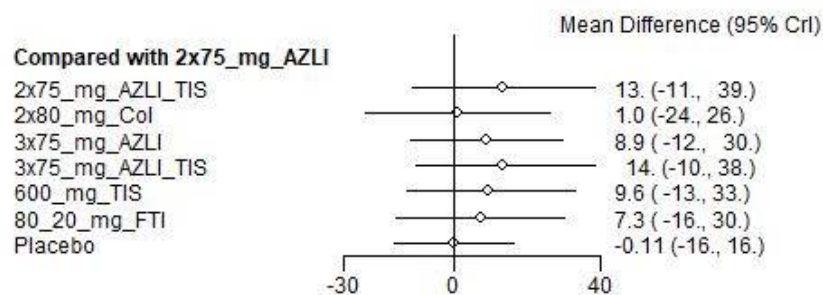

Figure S3. Forest plot for change in FEV1%, interventions compared to 75 mg AZLI (b.i.d.).

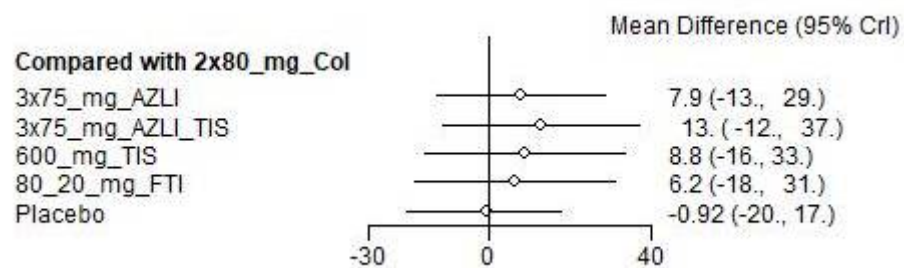

Figure S4. Forest plot for change in FEV1%, intervention compared to 80 mg Colistin (b.i.d.).

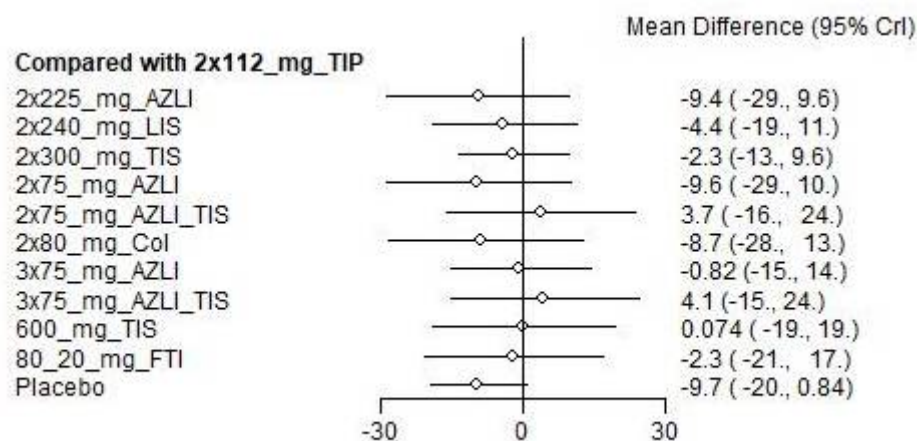

**Figure S5.** Forest plot for change in FEV1%, intervention compared to 112 mg Tobramxin inhalation powder (b.i.d.).

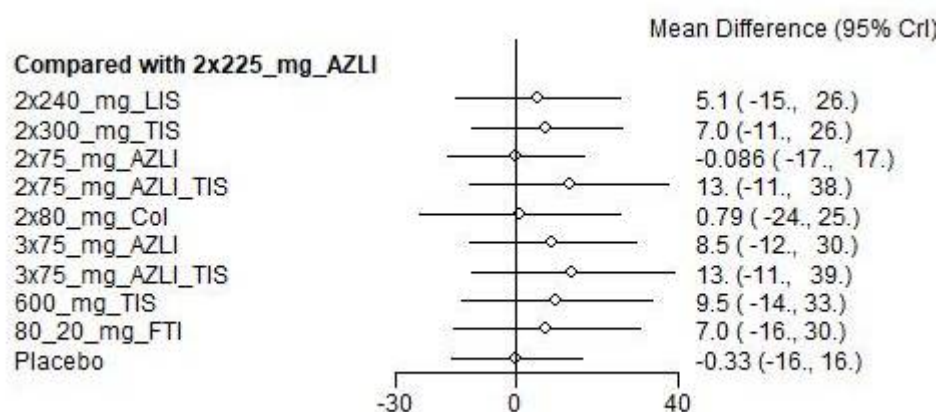

**Figure S6.** Forest plot for change in FEV1%, intervention compared to 225 mg Aztreonam lysine (b.i.d.).

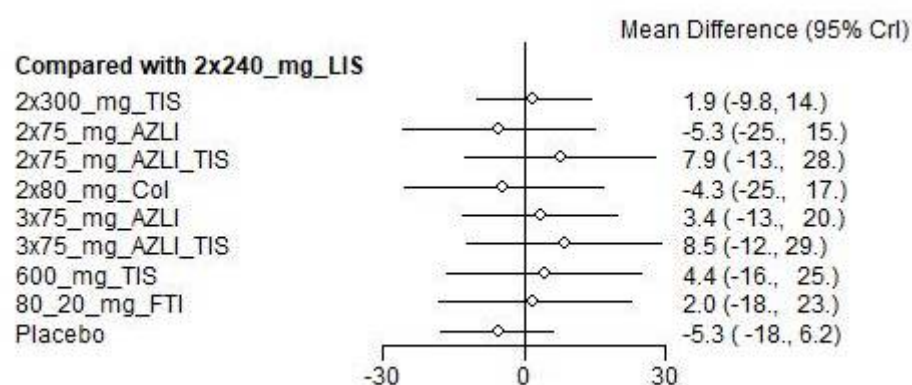

**Figure S7.** Forest plot for change in FEV1%, intervention compared to 240 mg Levofloxacin inhalation solution (b.i.d.).

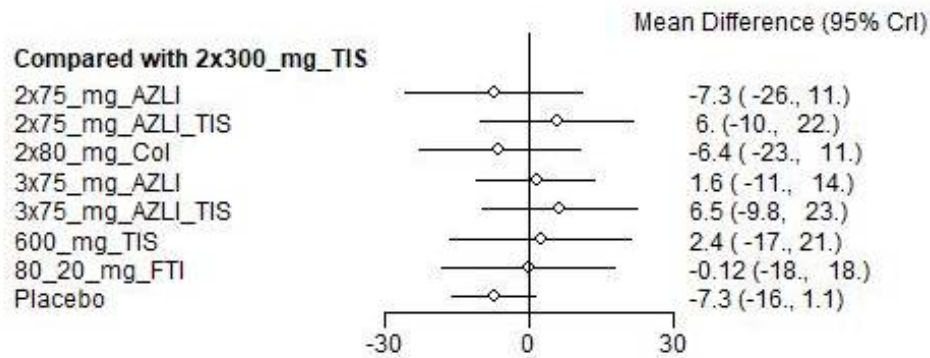

**Figure S8.** Forest plot for change in FEV1%, intervention compared to 300 mg Tobramycin inhalation solution (b.i.d.).

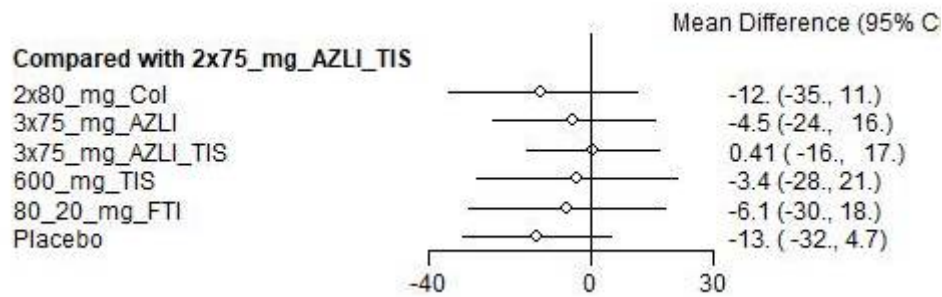

**Figure S9.** Forest plot for change in FEV1%, intervention compared to 75 mg Aztreonam lysine with run in Tobramycin.

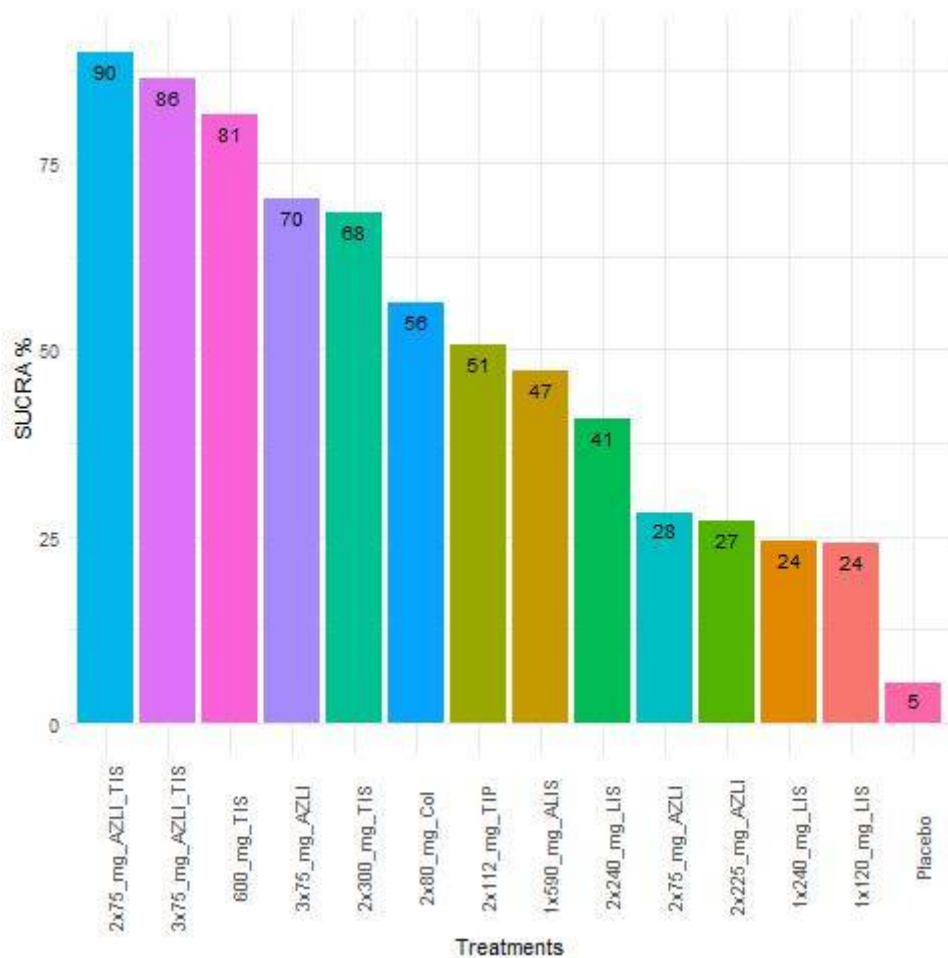

**Figure S10.** Surface under the cumulative ranking curves (SUCRA%) values of change in *Pseudomonas* sputum density; AZLI= aztreonam lysine, TIS=tobramycin inhalation solution, TIP=tobramycin inhalation powder, LIS=levofloxacin inhalation solution, ALIS: amikacin inhalation solution.

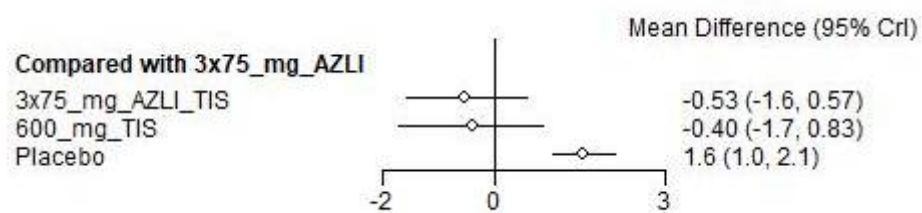

**Figure S11.** Forest plot for change in *Pseudomonas* sputum density interventions compared to 3 × 75 mg aztronam.

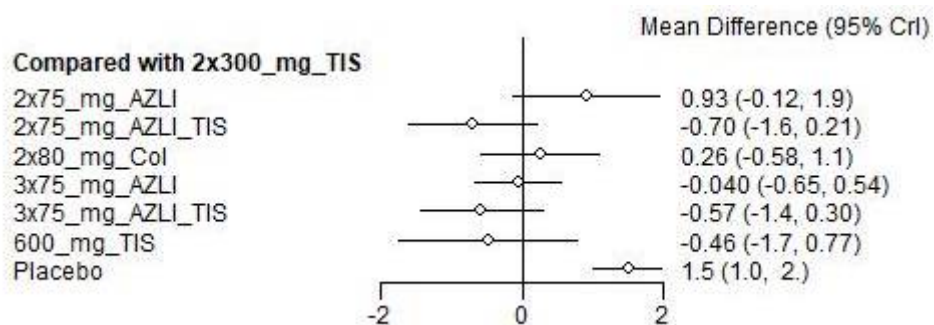

**Figure S12.** Forest plot for change in *Pseudomonas* sputum density interventions compared to 2 × 300 mg tobramycin inhalation solution.



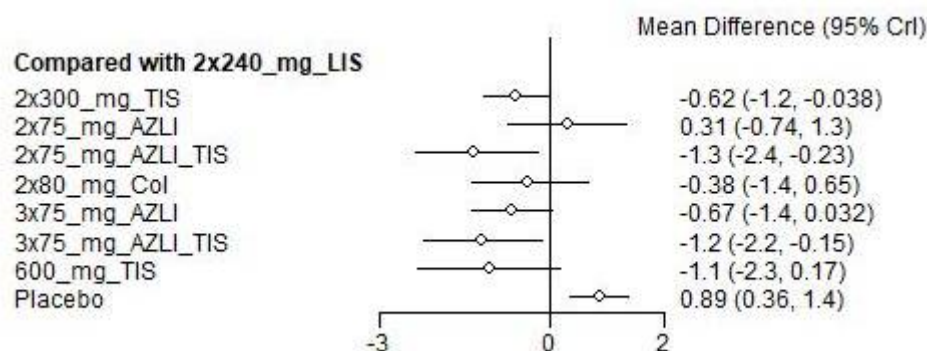

**Figure S13.** Forest plot for change in *Pseudomonas* sputum density interventions compared to 2 × 240 levofloxacin inhalation solution.

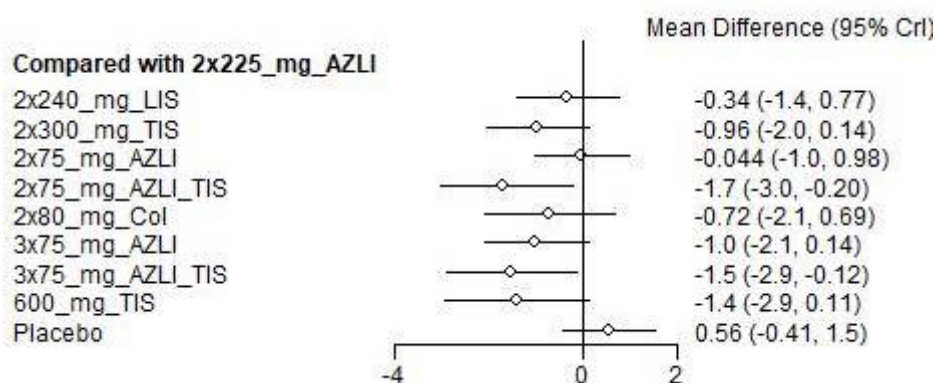

**Figure S14.** Forest plot for change in *Pseudomonas* sputum density interventions compared to 2 × 225 mg aztronam-lysine.

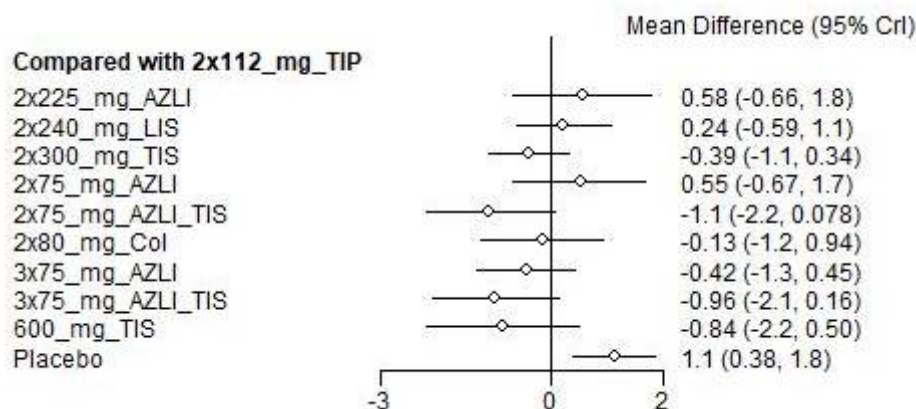

**Figure S15.** Forest plot for change in *Pseudomonas* sputum density interventions compared to 2 × 112 mg tobramycin inhalation powder.

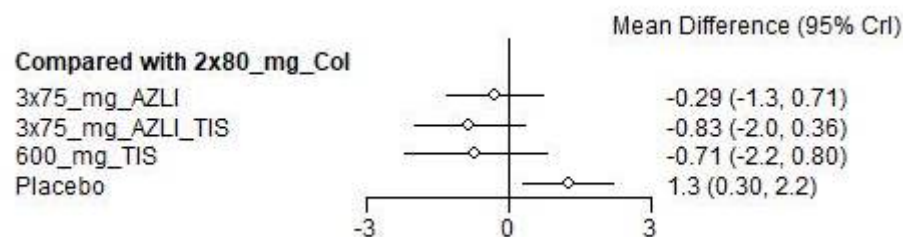

**Figure S16.** Forest plot for change in *Pseudomonas* sputum density interventions compared to 2 × 80 mg colistin.

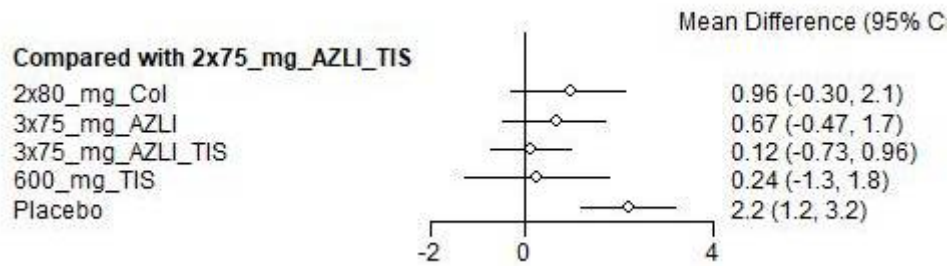

**Figure S17.** Forest plot for change in *Pseudomonas* sputum density interventions compared to 2 × 75 mg aztronam-ly-sine+run in tobramycin.

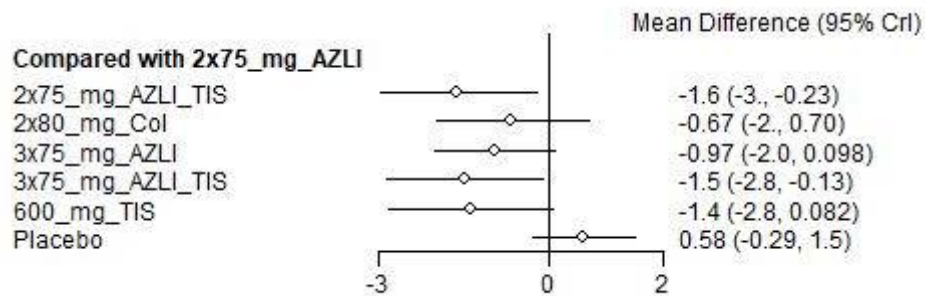

**Figure S18.** Forest plot for change in *Pseudomonas* sputum density interventions compared to 2 × 75 mg aztronam-ly-sine.

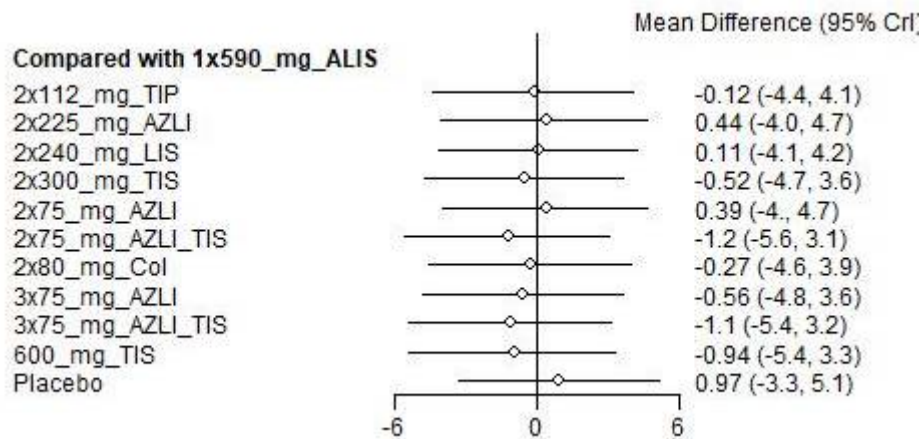

**Figure S19.** Forest plot for change in *Pseudomonas* sputum density interventions compared to 1 × 590 mg amikacin.

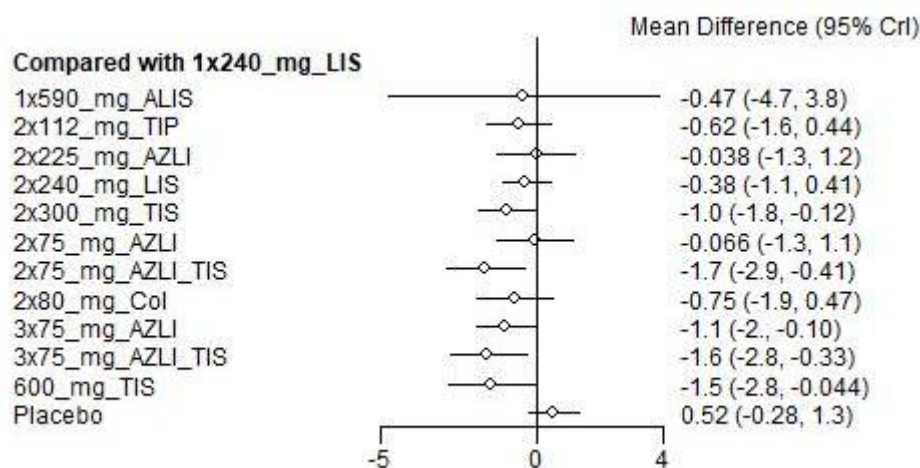

**Figure S20.** Forest plot for change in *Pseudomonas* sputum density interventions compared to 1 × 240 mg levofloxacin inhalation solution.

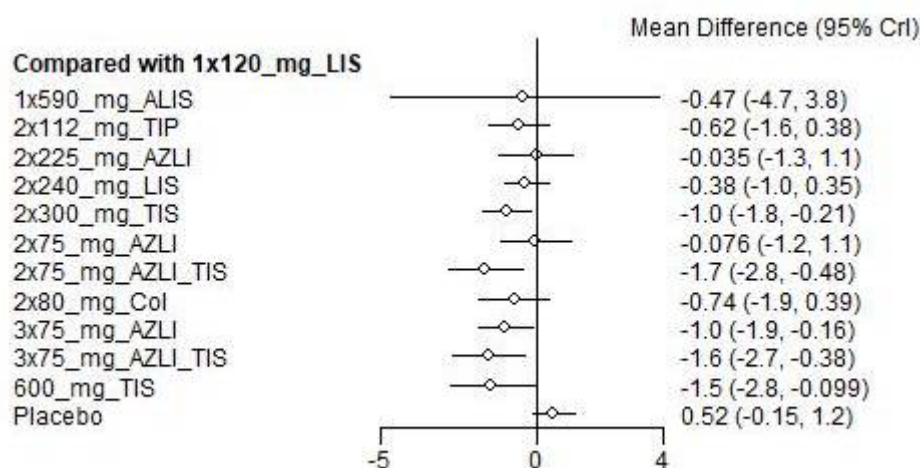

**Figure S21.** Forest plot for change in *Pseudomonas* sputum density interventions compared to 3 × 75 mg aztronam+run in tobramycin.

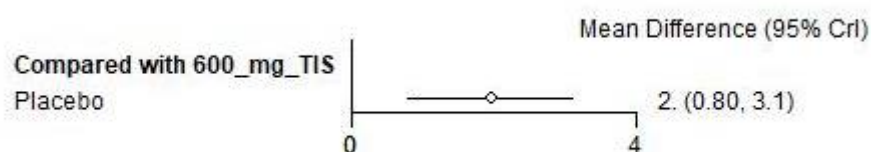

**Figure S22.** Forest plot for change in *Pseudomonas* sputum density interventions compared to 600 mg tobramycin.

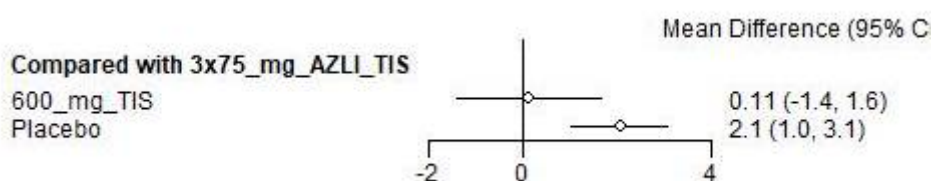

**Figure S23.** Forest plot for change in *Pseudomonas* sputum density interventions compared to 3 × 75 mg aztronam+run in tobramycin.



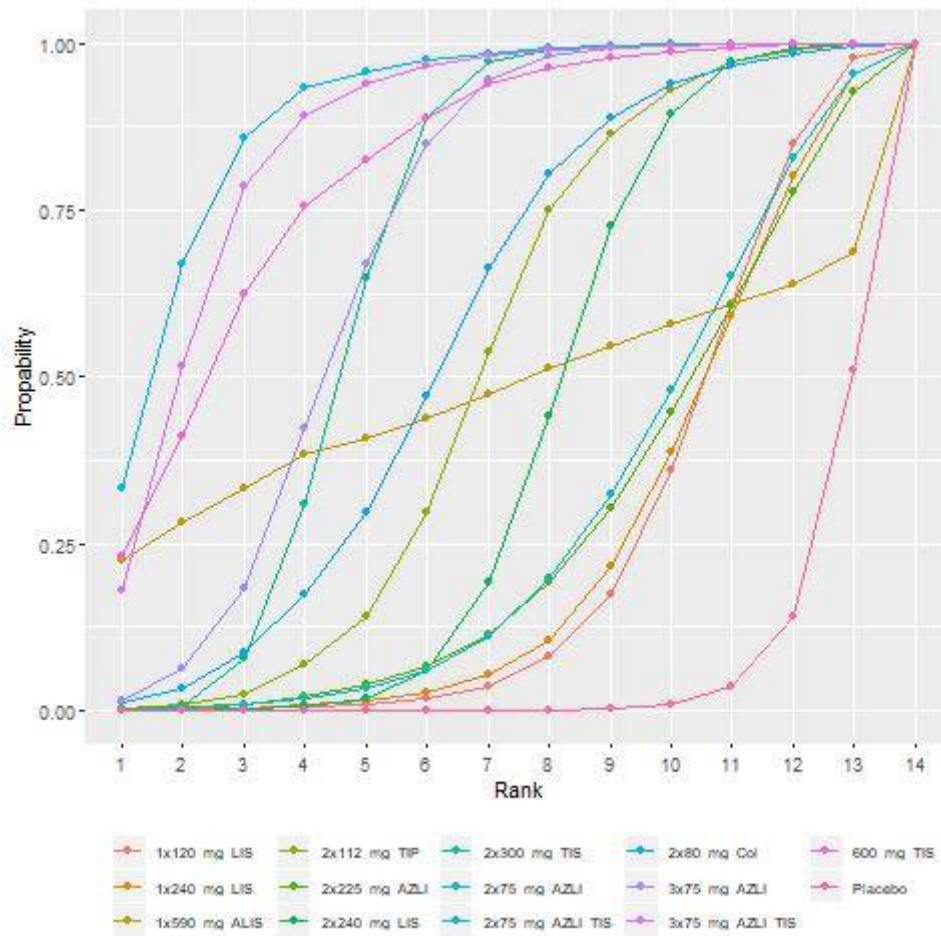

**Figure S24.** Cumulative ranking curves of change in *Pseudomonas* sputum density.

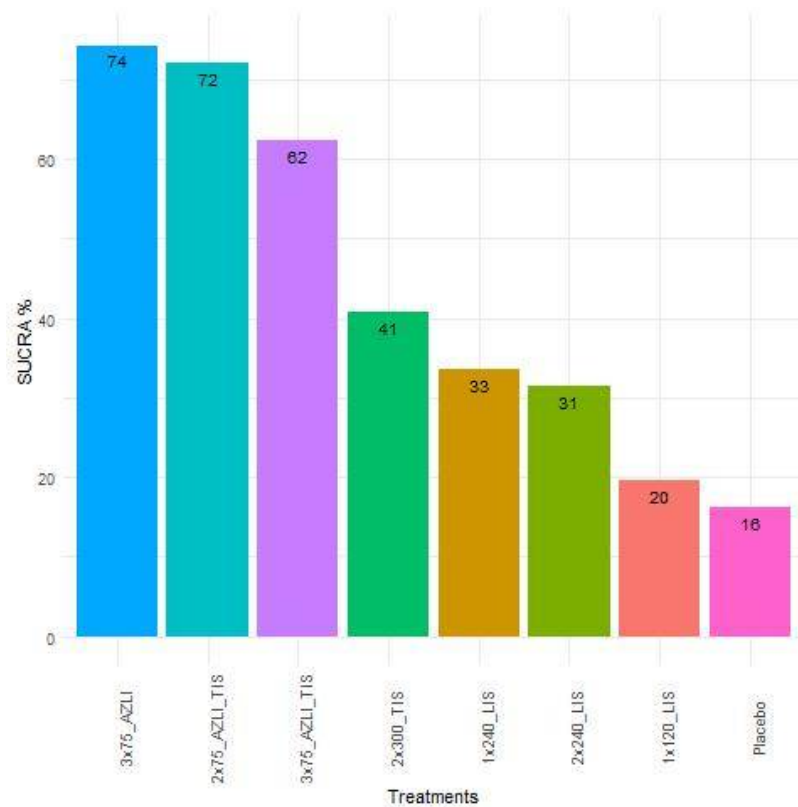

**Figure S25.** Surface under the cumulative ranking curves (SUCRA%) values of change in CFQR-RSS.

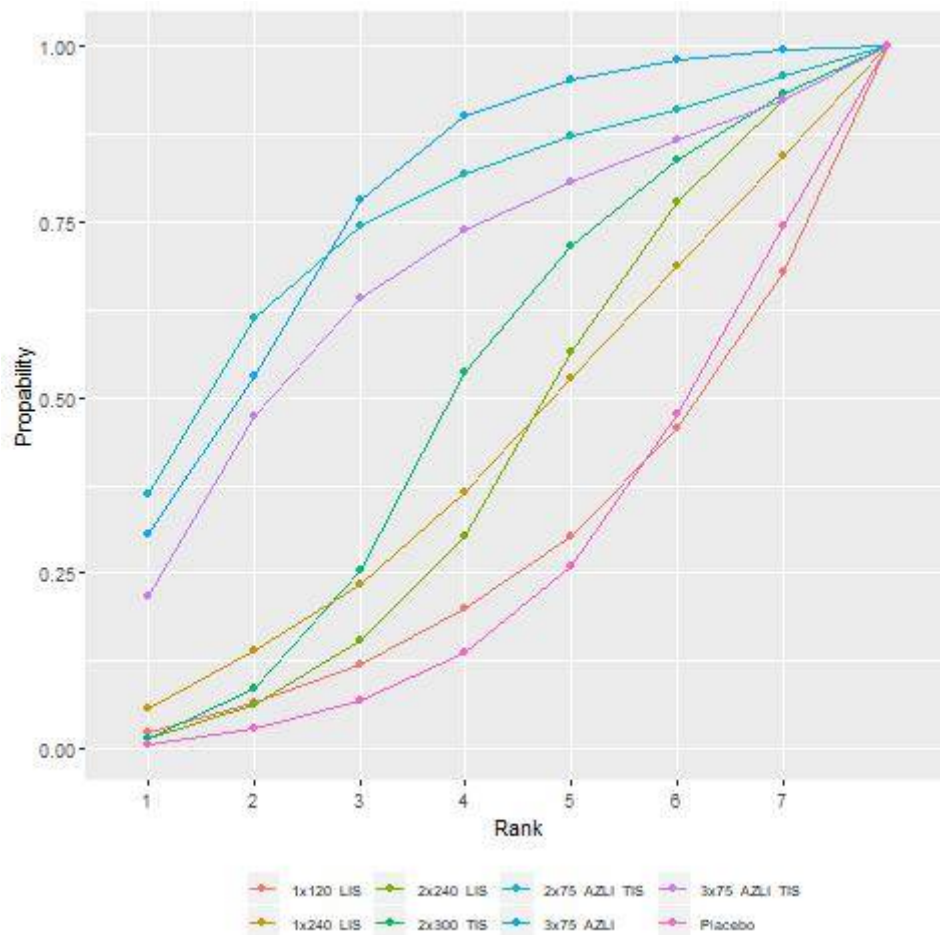

**Figure S26.** Cumulative ranking curves of change in CFQR-RSS.

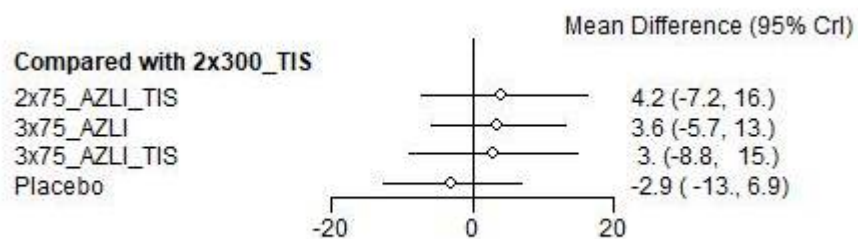

**Figure S27.** Forest plot for change in CFQR-RSS interventions compared to 2 × 300 mg TIS.

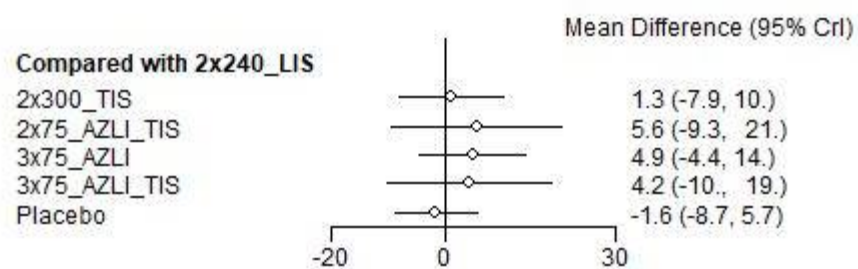

**Figure S28.** Forest plot for change in CFQR-RSS interventions compared to 2 × 240 mg LIS.

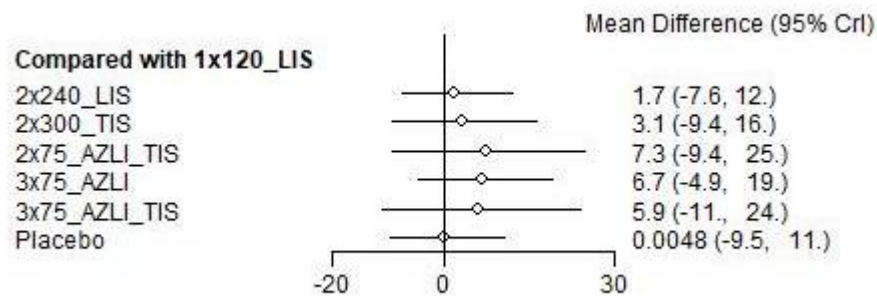

**Figure S29.** Forest plot for change in CFQR-RSS interventions compared to 1 × 120 mg LIS.

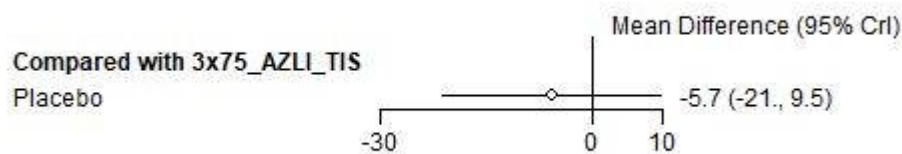

**Figure S30.** Forest plot for change in CFQR-RSS compared to 3 × 75 mg AZLI+TIS.

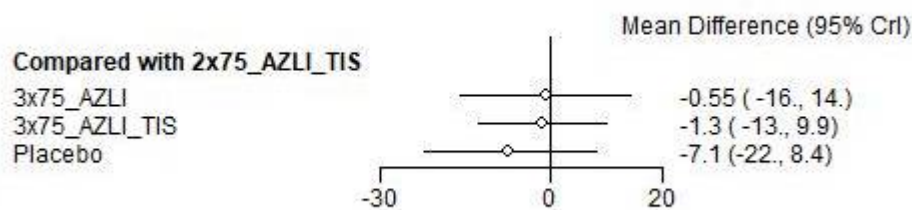

**Figure S31.** Forest plot for change in CFQR-RSS interventions compared to 2 × 75 mg AZLI+TIS.

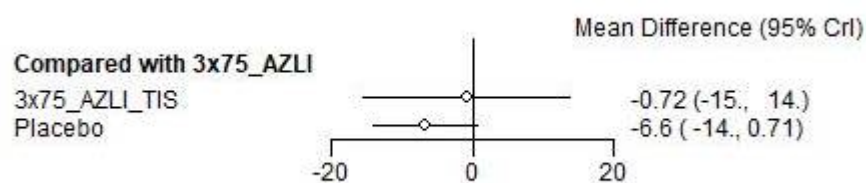

**Figure S32.** Forest plot for change in CFQR-RSS interventions compared to 3 × 75 mg AZLI.

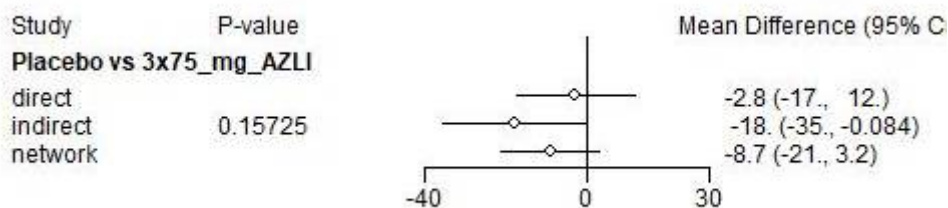

**Figure S33.** Consistency test in change in FEV1% \.

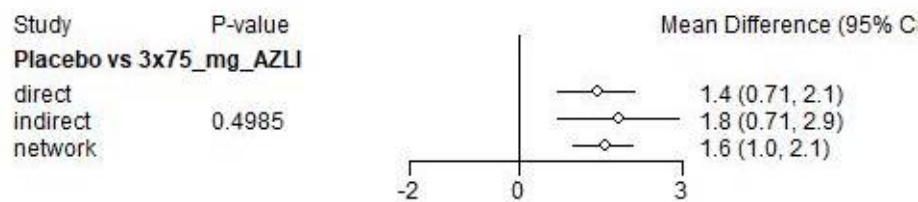

**Figure S34.** Consistency test in change *Pseudomonas* sputum density.

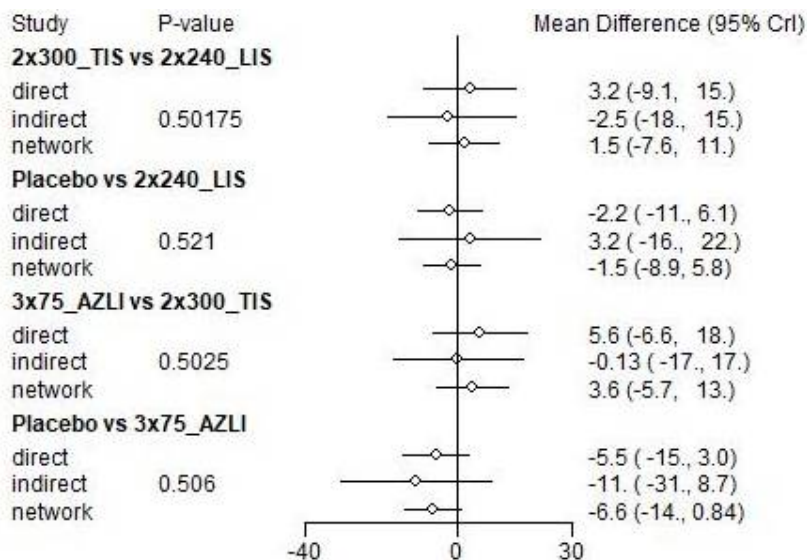

**Figure S35.** Consistency test in change in CFQR-RSS.

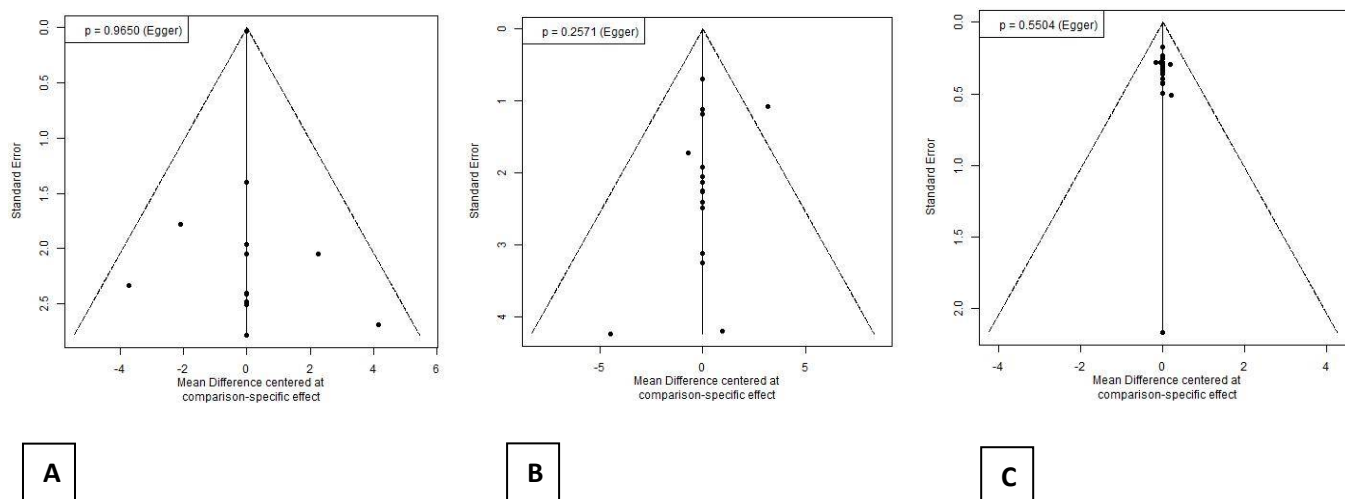

**Figure S36.** Funnel plot and Egger's test of A: change in FEV1%, B: change in *Pseudomonas* sputum density, C: change in CFQR-RS.

|                    |              |          |       |   |   |   |   |   |   |   |
|--------------------|--------------|----------|-------|---|---|---|---|---|---|---|
| Assael             | AZLI         | TIS      | FEV1% | 1 | ? | ? | + | + | ? | ! |
| Bilton D           | ALIS         | TIS      | FEV1% | 1 | + | ? | + | + | ? | ! |
| Flume P            | LIS 240 mg   | Placebo  | FEV1% | 1 | ? | + | + | + | ? | ! |
| Galevi             | TIP          | Placebo  | FEV1% | 1 | + | + | + | + | ? | ! |
| Hodson             | Tobramycin   | Colistin | FEV1% | 1 | ? | ? | + | + | ? | ! |
| Geller D           | levofloxacin | Placebo  | FEV1% | 1 | ? | + | + | + | ? | ! |
| Konstan M 2011     | TIP          | Placebo  | FEV1% | 1 | ? | + | + | + | ? | ! |
| Lenoir             | TSI          | Placebo  | FEV1% | 1 | ? | + | + | + | ? | ! |
| McCoy              | AZLI BID     | Placebo  | FEV1% | 1 | ? | + | + | + | ? | ! |
| Ramsey B           | Tobramycin   | Placebo  | FEV1% | 1 | ? | + | + | + | ? | ! |
| Ramsey B 1999      | TIS          | Placebo  | FEV1% | 1 | ? | + | + | + | ? | ! |
| Retsch-Bogart 2007 | 75 mg AZLI   | Placebo  | FEV1% | 1 | ? | + | + | + | ? | ! |
| Retsch-Bogart 2009 | 75 mg AZLI   | Placebo  | FEV1% | 1 | ? | + | ? | + | ? | ! |
| Trapnel            | FTI          | Placebo  | FEV1% | 1 | ? | + | + | + | ? | ! |
| Wainwright         | AZLI TID     | Placebo  | FEV1% | 1 | + | + | + | + | ? | ! |
| Konstan M 2010     | TIP          | TIS      | FEV1% | 1 | ? | ? | + | + | ? | ! |
| Elborn             | LIS          | TIS      | FEV1% | 1 | ? | ? | + | + | ? | ! |

**Figure S37.** Summary of risk of bias assessment in change in FEV1%.

|                       |      |          |             |   |   |   |   |   |   |   |
|-----------------------|------|----------|-------------|---|---|---|---|---|---|---|
| Retch-Bogart 2009.PA  | AZLI | Placebo  | Pseudomonas | 1 | ? | + | + | + | ? | ! |
| Trapnel PA            | FTI  | FTI      | Pseudomonas | 1 | ? | + | + | + | ? | ! |
| McCoy PA              | AZLI | Placebo  | Pseudomonas | 1 | ? | + | + | + | ? | ! |
| Assael PA             | AZLI | TIS      | Pseudomonas | 1 | ? | + | + | + | ? | ! |
| Ramsey 1999 PA        | LIS  | Placebo  | Pseudomonas | 1 | ? | + | + | + | ? | ! |
| Geller PA             | TIS  | Placebo  | Pseudomonas | 1 | ? | + | + | + | ? | ! |
| Lenoir PA             | LIS  | TIS      | Pseudomonas | 1 | ? | + | + | + | ? | ! |
| Elborn PA             | TIS  | Placebo  | Pseudomonas | 1 | ? | ? | ? | + | ? | ! |
| Ramsey 93 PA          | TIP  | TIS      | Pseudomonas | 1 | ? | + | + | + | ? | ! |
| Konstan M 2010 PA     | TIS  | Placebo  | Pseudomonas | 1 | ? | + | + | + | ? | ! |
| Chuchalin PA          | AZLI | Placebo  | Pseudomonas | 1 | ? | + | + | + | ? | ! |
| Retsch-Bogart 2007 PA | TIS  | Colistin | Pseudomonas | 1 | ? | + | + | + | ? | ! |
| Hodon PA              | TIP  | Placebo  | Pseudomonas | 1 | ? | + | + | + | ? | ! |
| Konstan 2011 PA       | TIP  | Placebo  | Pseudomonas | 1 | ? | + | + | + | ? | ! |
| Galeva PA             | TIP  | Placebo  | Pseudomonas | 1 | ? | + | + | + | ? | ! |
| Wainwright PA         | AZLI | Placebo  | Pseudomonas | 1 | + | + | ? | + | ? | ! |
| Chuchalin             | TIS  | Placebo  | Pseudomonas | 1 | ? | ? | + | + | ? | ! |

**Figure S38.** Summary of risk of bias assessment in change in Pseudomonas sputum density.



**Table S1.** League table of change in FEV1%. The overall risk of bias assessment were judged to raise some concern and in line with the GRADE approach all comparisons were judged as very low quality ⊕○○○.

|                             |                            |                         |                        |                        |                        |                        |                        |                          |                         |                         |                        |         |
|-----------------------------|----------------------------|-------------------------|------------------------|------------------------|------------------------|------------------------|------------------------|--------------------------|-------------------------|-------------------------|------------------------|---------|
| 3x75 mg AZLI+run-in<br>Tob. |                            |                         |                        |                        |                        |                        |                        |                          |                         |                         |                        |         |
| 0.41 (-16; 17)<br>⊕○○○      | 2x75 mgAZLI+run-in<br>Tob. |                         |                        |                        |                        |                        |                        |                          |                         |                         |                        |         |
| 4.1 (-15; 24)<br>⊕○○○       | 3.7 (-16; 24)<br>⊕○○○      | 2x112 mg TIP            |                        |                        |                        |                        |                        |                          |                         |                         |                        |         |
| 4 (-21; 29)<br>⊕○○○         | 3.4 (-21; 28)<br>⊕○○○      | 0.074 (-19; 19)<br>⊕○○○ | 1x600 mg<br>Tobramycin |                        |                        |                        |                        |                          |                         |                         |                        |         |
| 4.9 (-15; 25)<br>⊕○○○       | 4.5 (-16; 24)<br>⊕○○○      | 0.82 (-14; 15)<br>⊕○○○  | 0.91 (-20; 21)<br>⊕○○○ | 3x75 mg AZLI           |                        |                        |                        |                          |                         |                         |                        |         |
| 6.5 (-9.8; 23)<br>⊕○○○      | 6 (-10; 22)<br>⊕○○○        | 2.3 (-9.6; 13)<br>⊕○○○  | 2.4 (-17; 21)<br>⊕○○○  | 1.6 (-11; 14)<br>⊕○○○  | 2x300 mg TIS           |                        |                        |                          |                         |                         |                        |         |
| 6.4 (-8; 31)<br>⊕○○○        | 6.1 (-18; 30)<br>⊕○○○      | 9.7 (-0.84; 20)<br>⊕○○○ | 2.4 (-21; 26)<br>⊕○○○  | 1.5 (-18; 1)<br>⊕○○○   | 0.12 (-18; 18)<br>⊕○○○ | 80/20 mg FTI           |                        |                          |                         |                         |                        |         |
| 7.5 (-17; 32)<br>⊕○○○       | 7.2 (-17; 31)<br>⊕○○○      | 3.6 (-16; 22)<br>⊕○○○   | 3.6 (-20; 27)<br>⊕○○○  | 2.7 (-18; 24)<br>⊕○○○  | 1.2 (-17; 20)<br>⊕○○○  | 1.1 (-16; 18)<br>⊕○○○  | 160/40 mg FTI          |                          |                         |                         |                        |         |
| 8.5 (-12; 29)<br>⊕○○○       | 7.9 (-13; 28)<br>⊕○○○      | 4.4 (-11; 19)<br>⊕○○○   | 4.4 (-16; 25)<br>⊕○○○  | 3.4 (-13; 20)<br>⊕○○○  | 2.3 (-9.6; 13)<br>⊕○○○ | 2.0 (-18; 23)<br>⊕○○○  | 0.73 (-20; 21)<br>⊕○○○ | 2x240 mg<br>Levofloxacin |                         |                         |                        |         |
| 13 (-12; 37)<br>⊕○○○        | 12 (-11; -35)<br>⊕○○○      | 8.7 (-13; 28)<br>⊕○○○   | 8.8 (-16; 33)<br>⊕○○○  | 7.9 (-13; 29)<br>⊕○○○  | 6.4 (-11; 23)<br>⊕○○○  | 6.2 (-18; 31)<br>⊕○○○  | 5.0 (-21; 29)<br>⊕○○○  | 4.3 (-17; 25)<br>⊕○○○    | 2x80 mg Colistin        |                         |                        |         |
| 13 (-11; 39)<br>⊕○○○        | 13 (-11; 38)<br>⊕○○○       | 9.4 (-9.6; 29)<br>⊕○○○  | 9.5 (-14; 33)<br>⊕○○○  | 8.5 (-12; 30)<br>⊕○○○  | 7.0 (-11; 26)<br>⊕○○○  | 7.0 (-16; 30)<br>⊕○○○  | 5.9 (-17; 29)<br>⊕○○○  | 5.1 (-15; 26)<br>⊕○○○    | 0.79 ( -24; 25)<br>⊕○○○ | 2x225 mg AZLI           |                        |         |
| 14 (-10; 38)<br>⊕○○○        | 13 (-11; 39)<br>⊕○○○       | 3.7 (-16; 24)<br>⊕○○○   | 9.6 (-13; 33)<br>⊕○○○  | 8.9 (-12; 30)<br>⊕○○○  | 7.3 (-26; 11)<br>⊕○○○  | 7.3 (-16; 30)<br>⊕○○○  | 6.2 (-17; 29)<br>⊕○○○  | 5.3 (-15; 25)<br>⊕○○○    | 1.0 (-26; 24)<br>⊕○○○   | 0.086 (-17; 17)<br>⊕○○○ | 2x75 mg AZLI           |         |
| 14 (-4.5; 32)<br>⊕○○○       | 13 (-4.7; 32)<br>⊕○○○      | 9.7 (-0.94; 20)<br>⊕○○○ | 9.8 (-6.8; 26)<br>⊕○○○ | 8.8 (-3.1; 21)<br>⊕○○○ | 7.3 (-1.1; 16)<br>⊕○○○ | 7.3 (-9.0; 24)<br>⊕○○○ | 6.1 (-10; 23)<br>⊕○○○  | 5.3 (-6.2; 18)<br>⊕○○○○  | 0.92 (-17; 20)<br>⊕○○○  | 0.33 (-16; 16)<br>⊕○○○  | 0.11 (-16; 16)<br>⊕○○○ | Placebo |

**Table S2.** League table of change in CFQR-RSS.

|                                 |                                             |                                             |                                                |                                                  |                                                  |                                                  |                |
|---------------------------------|---------------------------------------------|---------------------------------------------|------------------------------------------------|--------------------------------------------------|--------------------------------------------------|--------------------------------------------------|----------------|
| <b>3x75 mg Aztreonam-lysine</b> |                                             |                                             |                                                |                                                  |                                                  |                                                  |                |
| <b>0.55 (-14; 16)</b>           | <b>2x75 mg Aztreonam-lysine+run in Tob.</b> |                                             |                                                |                                                  |                                                  |                                                  |                |
| <b>0.72 (-14; 15)</b>           | <b>1.3 (-9.9; 13)</b>                       | <b>3x75 mg Aztreonam-lysine+run in Tob.</b> |                                                |                                                  |                                                  |                                                  |                |
| <b>3 (-8.8; 15)</b>             | <b>4.2 (-7.2; 16)</b>                       | <b>3.6 (-5.7; 13)</b>                       | <b>2x300 mg Tobramycin inhalation solution</b> |                                                  |                                                  |                                                  |                |
| <b>5.0 ('-6.5; 17)</b>          | <b>5.6 (-11; 23)</b>                        | <b>4.2 (-13; 22)</b>                        | <b>1.4 (-11; 14)</b>                           | <b>1x240 mg Levofloxacin inhalation solution</b> |                                                  |                                                  |                |
| <b>4.2 (-10; 19)</b>            | <b>5.6 (-9.3; 21)</b>                       | <b>4.9 (-4.4; 14)</b>                       | <b>1.3 (-7.9; 10)</b>                          | <b>0.043 ('-9.8; 11)</b>                         | <b>2x240 mg Levofloxacin inhalation solution</b> |                                                  |                |
| <b>6.7 (-4.9; 19)</b>           | <b>7.3 (-9.4; 25)</b>                       | <b>5.9 (-11; 24)</b>                        | <b>3.1 (-9.4; 16)</b>                          | <b>1.7 (-13; 9.1)</b>                            | <b>1.7 (-12; 7.6)</b>                            | <b>1x120 mg Levofloxacin inhalation solution</b> |                |
| <b>6.6 (-0.74; 14)</b>          | <b>7.1 (-8.4; 22)</b>                       | <b>5.7 (-9.5; 21)</b>                       | <b>2.9 (-6.9; 13)</b>                          | <b>1.5 (-11; 9.1)</b>                            | <b>1.6 (-5.7; 8.7)</b>                           | <b>0.0048 (-9.5; 11)</b>                         | <b>Placebo</b> |

Table S3. summary of findings of change in *Pseudomonas* sputum density.

|                                             | TIS vs.<br>TIP                      | TIS vs.<br>3 × 75mg<br>AZLI  | TIS vs.<br>3 × 75 mg<br>TIS AZLI+TIS | TIS vs.<br>3 × 75 AZLI              | TIS vs.<br>2 × 75 mg<br>AZLI        | TIS vs. Col<br>2 × 240 mg<br>LIS    | TIS vs.<br>Placebo                  | 3 × 75 mg<br>AZLI vs.<br>Placebo    | 2 × 75 mg<br>AZLI vs.<br>Placebo    | 600 mg TIS<br>vs. Placebo           | TIS vs.<br>ALIS                     |
|---------------------------------------------|-------------------------------------|------------------------------|--------------------------------------|-------------------------------------|-------------------------------------|-------------------------------------|-------------------------------------|-------------------------------------|-------------------------------------|-------------------------------------|-------------------------------------|
| <b>Study limita-<br/>tions</b> <sup>1</sup> | ↓                                   | ↓                            | ↓                                    | ↓                                   | ↓                                   | ↓                                   | ↓                                   | ↓                                   | ↓                                   | ↓                                   | ↓                                   |
| -                                           | -                                   | -                            | some con-<br>cerns                   | some con-<br>cerns                  | some con-<br>cerns                  | some con-<br>cerns                  | some con-<br>cerns                  | some con-<br>cerns                  | some con-<br>cerns                  | some con-<br>cerns                  | some con-<br>cerns                  |
| ⊕⊕⊕⊙<br>Moderate evi-<br>dence              | ⊕⊕⊕⊙<br>Moderate<br>evidence        | ⊕⊙⊙⊙<br>Very low<br>evidence | -                                    | ↓↓                                  | ↓↓                                  | ↓↓                                  | ↓↓                                  | ↓↓                                  | ↓↓                                  | ↓↓                                  | ↓↓                                  |
| <b>Comments</b>                             | No signifi-<br>cant differ-<br>ence | -                            | -                                    | No signifi-<br>cant differ-<br>ence |
| <b>Inconsistency</b> <sup>2</sup>           | -                                   | -                            | -                                    | -                                   | -                                   | -                                   | -                                   | -                                   | -                                   | -                                   | -                                   |
| <b>Indirectness</b> <sup>3</sup>            | -                                   | -                            | -                                    | -                                   | -                                   | -                                   | -                                   | -                                   | -                                   | -                                   | -                                   |
| <b>Publication<br/>bias</b> <sup>4</sup>    | -                                   |                              |                                      |                                     | -                                   | -                                   | -                                   | -                                   | -                                   | -                                   | -                                   |
| <b>GRADE</b>                                | ⊕⊙⊙⊙<br>Very low<br>evidence        |                              |                                      |                                     | ⊕⊙⊙⊙<br>Very low<br>evidence        | ⊕⊙⊙⊙<br>Very low<br>evidence        | ⊕⊙⊙⊙<br>Very low<br>evidence        | ⊕⊙⊙⊙<br>Very low<br>evidence        | ⊕⊙⊙⊙<br>Very low ev-<br>idence      | ⊕⊙⊙⊙<br>Very low<br>evidence        | ⊕⊙⊙⊙<br>Very low<br>evidence        |

<sup>1</sup> Information detailed in Figure S26. <sup>2</sup> Inconsistency was evaluated by node splitting did not suggest inconsistency. <sup>3</sup> Where there was only one head-to-head trial indirectness could not be judged. <sup>4</sup> Small study effect is unlikely to distort our results, as indicated by the funnel plots.

**Table S4.** summary of findings of change in FEV1%.

|                                          | TIS vs.<br>TIP                      | TIS vs.<br>3 × 75 mg<br>AZLI+TIS    | TIS vs.<br>3 × 75 mg<br>AZLI+TIS    | TIS vs.<br>3 × 75 mg<br>AZLI        | TIS vs.<br>2 × 75 mg<br>AZLI        | TIS vs.<br>Col                      | TIS vs.<br>2×240 mg<br>LIS          | TIS vs.<br>Placebo                  | 3 × 75 mg<br>AZLI vs.<br>Placebo    | 2 × 75 mg<br>AZLI vs.<br>Placebo    | 600 mg TIS<br>vs. Placebo           | FTI vs.<br>Placebo                  |
|------------------------------------------|-------------------------------------|-------------------------------------|-------------------------------------|-------------------------------------|-------------------------------------|-------------------------------------|-------------------------------------|-------------------------------------|-------------------------------------|-------------------------------------|-------------------------------------|-------------------------------------|
| <b>Study limitations</b> <sup>1</sup>    | ↓                                   | ↓                                   | ↓                                   | ↓                                   | ↓                                   | ↓                                   | ↓                                   | ↓                                   | ↓                                   | ↓                                   | ↓                                   | ↓                                   |
| <b>Comments</b>                          | some con-<br>cerns                  |
| <b>Imprecision</b>                       | ↓↓                                  | ↓↓                                  | ↓↓                                  | ↓↓                                  | ↓↓                                  | ↓↓                                  | ↓↓                                  | ↓↓                                  | ↓↓                                  | ↓↓                                  | ↓↓                                  | ↓↓                                  |
| <b>Comments</b>                          | No signifi-<br>cant dif-<br>ference | No signifi-<br>cant differ-<br>ence |
| <b>Inconsistency</b> <sup>2</sup>        | -                                   | -                                   | -                                   | -                                   | -                                   | -                                   | -                                   | -                                   | -                                   | -                                   | -                                   | -                                   |
| <b>Indirectness</b> <sup>3</sup>         | -                                   | -                                   | -                                   | -                                   | -                                   | -                                   | -                                   | -                                   | -                                   | -                                   | -                                   | -                                   |
| <b>Publication<br/>bias</b> <sup>4</sup> | -                                   | -                                   | -                                   | -                                   | -                                   | -                                   | -                                   | -                                   | -                                   | -                                   | -                                   | -                                   |
| <b>GRADE</b>                             | ⊕○○○<br>Very low<br>evidence        |

<sup>1</sup> Information detailed in Figure S10. <sup>2</sup> Inconsistency was evaluated by node splitting did not suggest inconsistency. <sup>3</sup> Where there was only one head-to-head trial indirectness could not be judged. <sup>4</sup> Small study effect is unlikely to distort our results, as indicated by the funnel plots.

## 1. Funding source

This study was funded by „GINOP-2.3.2-15-2016-00048 - STAY ALIVE” co-financed by the European Union (European Regional Development Fund) within the framework of Programme Széchenyi 2020, and by Human Resources Development Operational Programme Grant, Grant Number: EFOP 3.6.2-16-2017-00006 – LIVE LONGER which is co-financed by the European Union (European Regional Development Fund) within the framework of Programme Széchenyi 2020. Study funders had no role in the study design, data analysis, collection of data, interpretation of results, writing of the findings or in the decision of publication.

## 2. Quality of evidence

In line with the Revised Cochrane risk-of-bias tool for randomized trials (RoB 2) risk of bias assessment was completed on individual study-level. We selected the highest risk of bias individual study then we totalized the overall RoB-assessment of treatments. We downgraded the quality of evidence by two if the comparison was at high risk of bias, and downgraded it by one if it was concluded to raise some concerns.

Inconsistency was evaluated by node splitting it did not suggest inconsistency for any outcome.

The population of the studies were clinically heterogeneous with different baseline characteristics. The concealment of group allocations were different in the studies some of them were open label and some of them were double blinded. Funnel plots were created for each outcome and Egger's tests were performed to assess small-study effect. Small study effect is unlikely to distort our results, as indicated by the funnel plots.
